# Supplementary material
Source: ML conference proceedings conference paper supplement (https://openreview.net/forum?id=HaFRdl9A5Y)

(a) Cumulative gamma

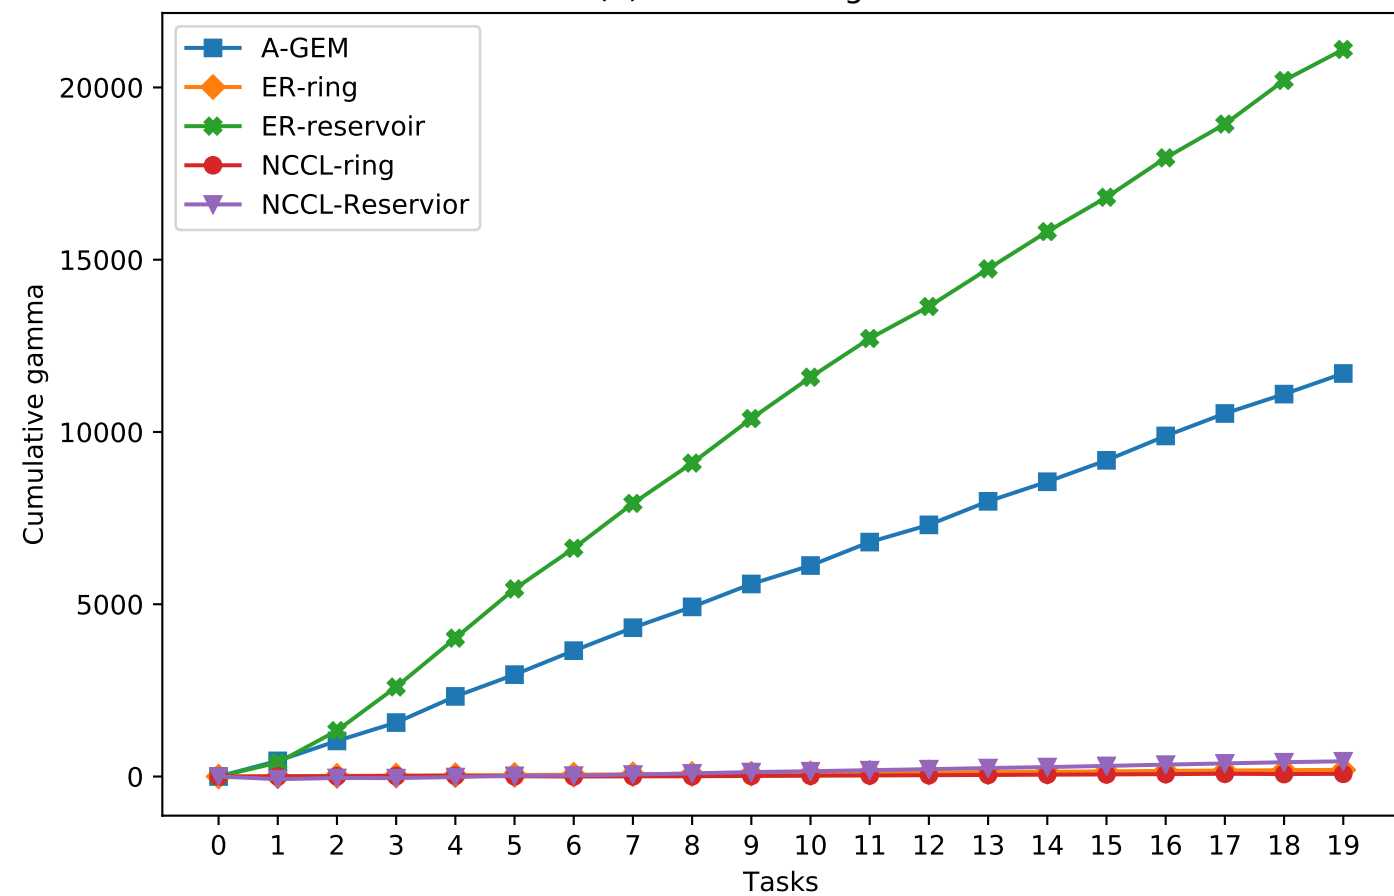

(b) Zoomed cumulative gamma

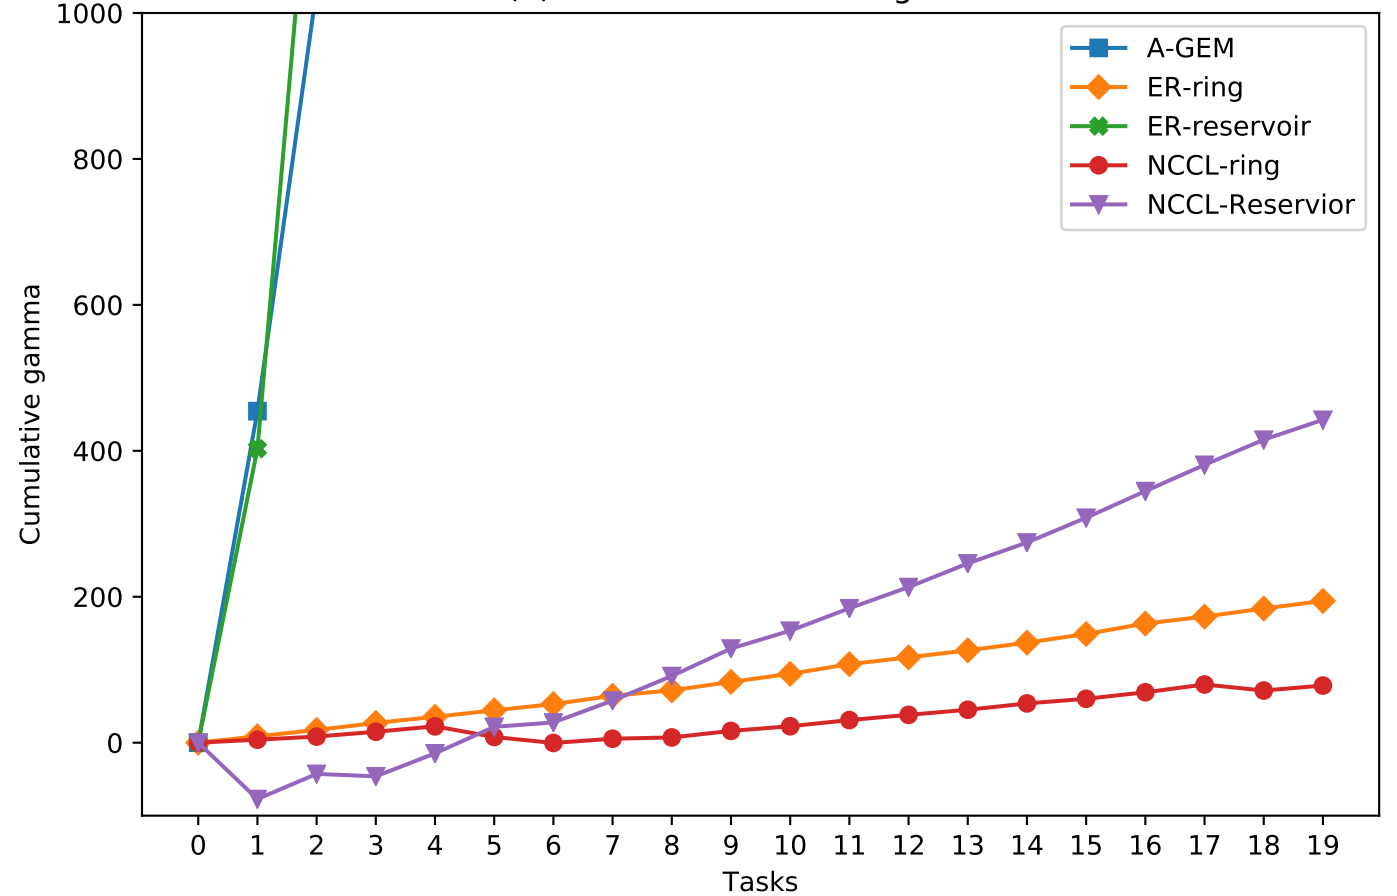

(c) cumulative gamma vs average accuracy

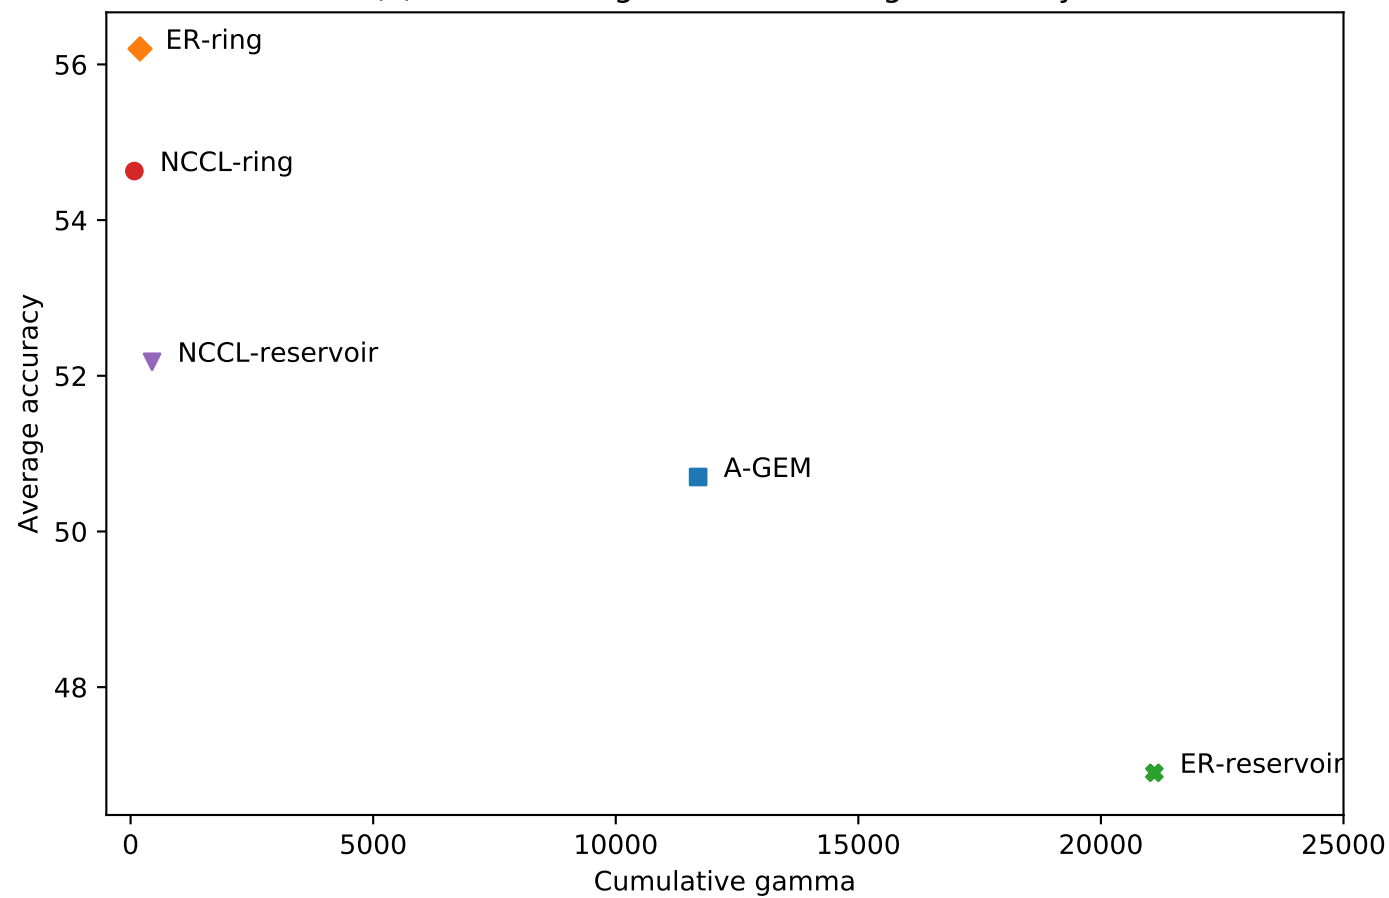

(d) cumulative gamma vs forgetting

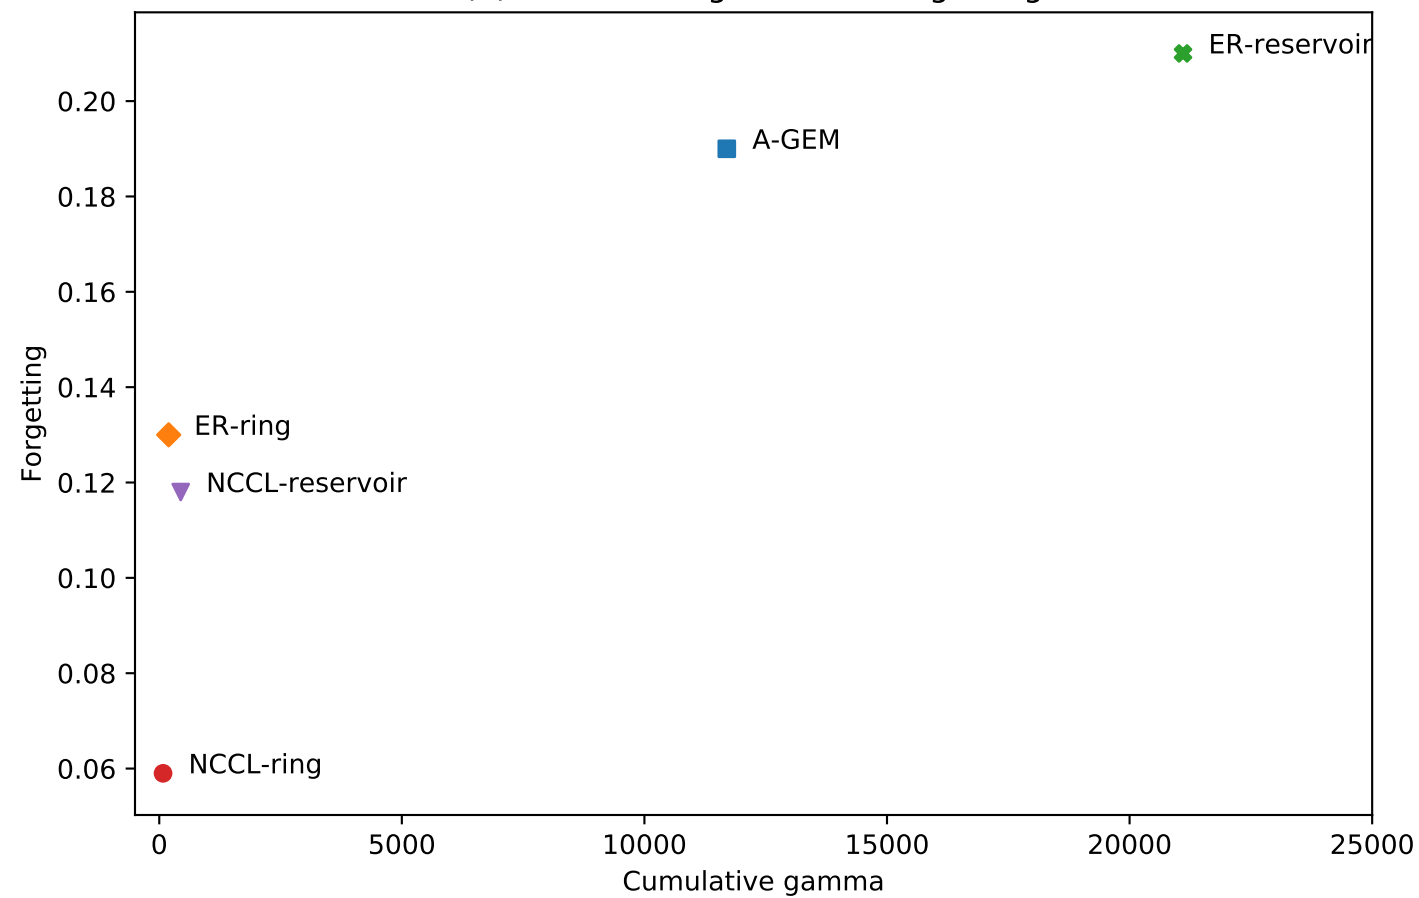

Supplement: supplementary_material [file attachment]
