# Supplementary material
Source: ML conference proceedings conference paper supplement (https://openreview.net/forum?id=HaFRdl9A5Y)

Cumulative gamma

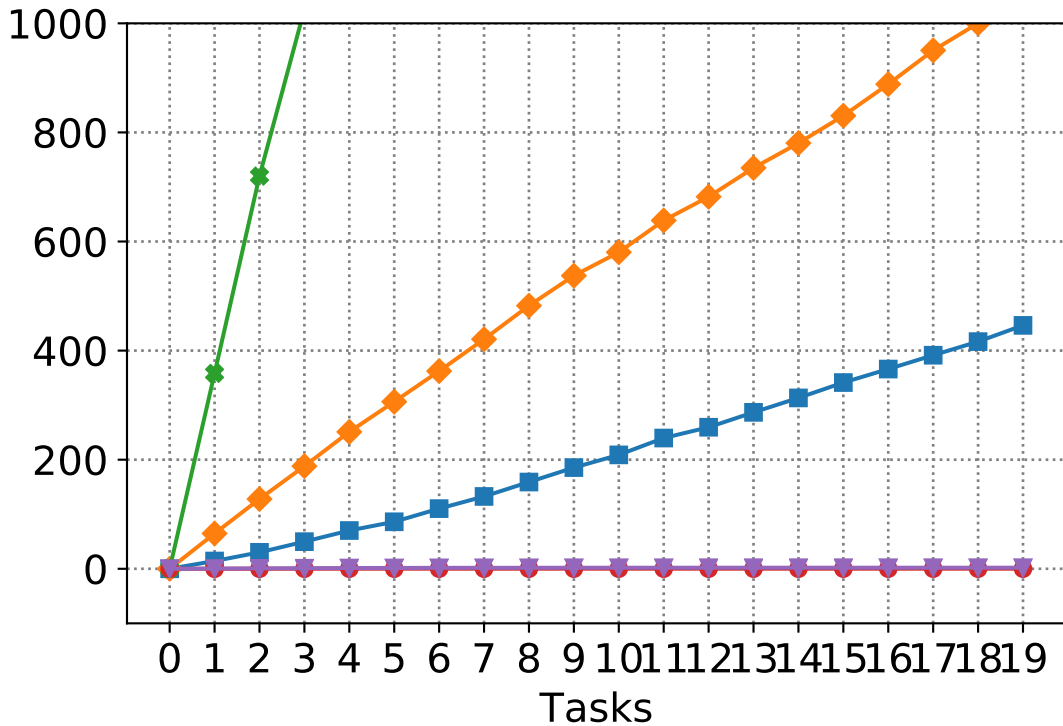

Supplement: supplementary_material [file attachment]

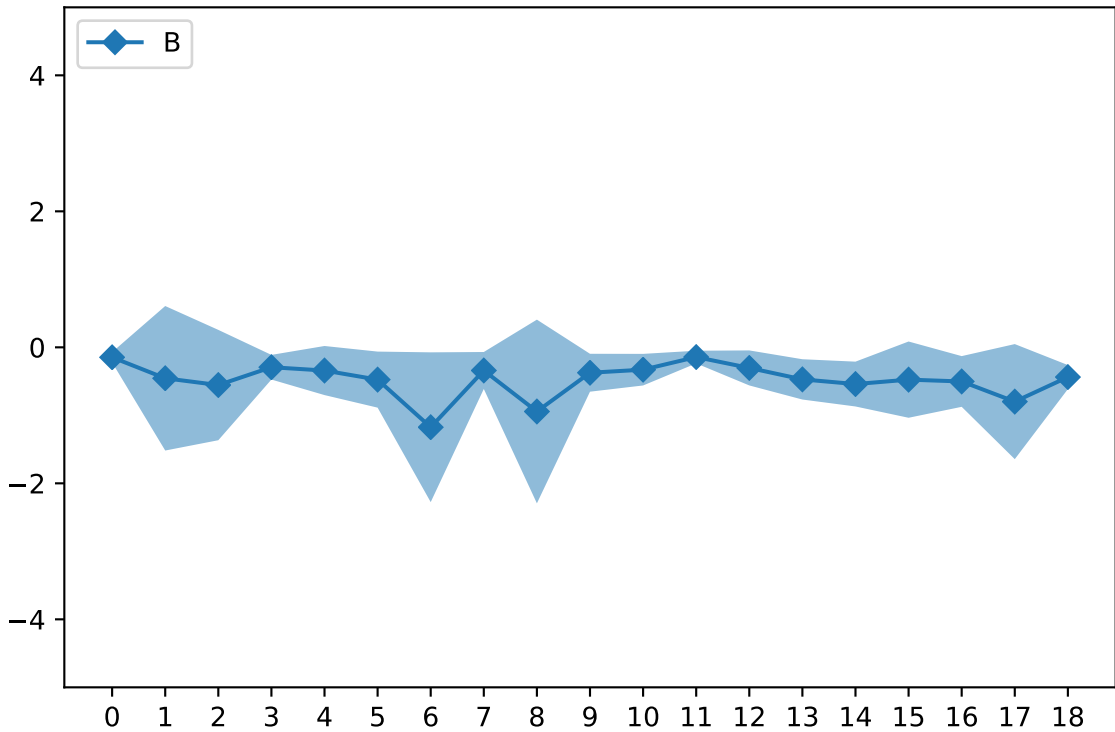

Supplement: supplementary_material [file attachment]

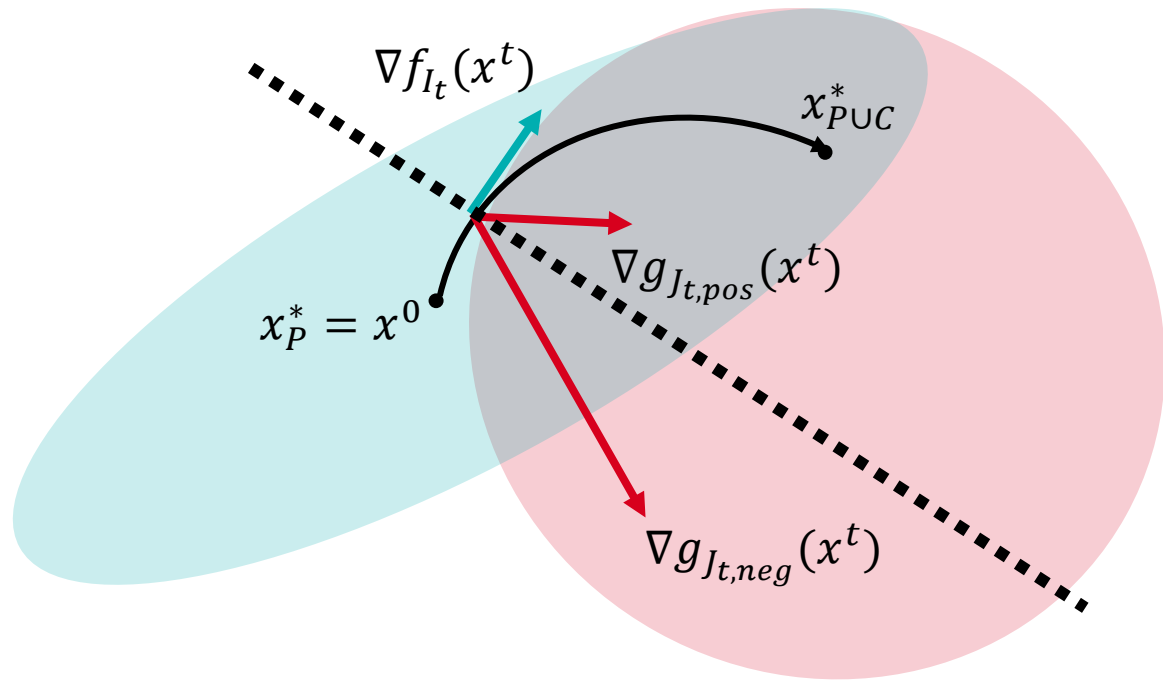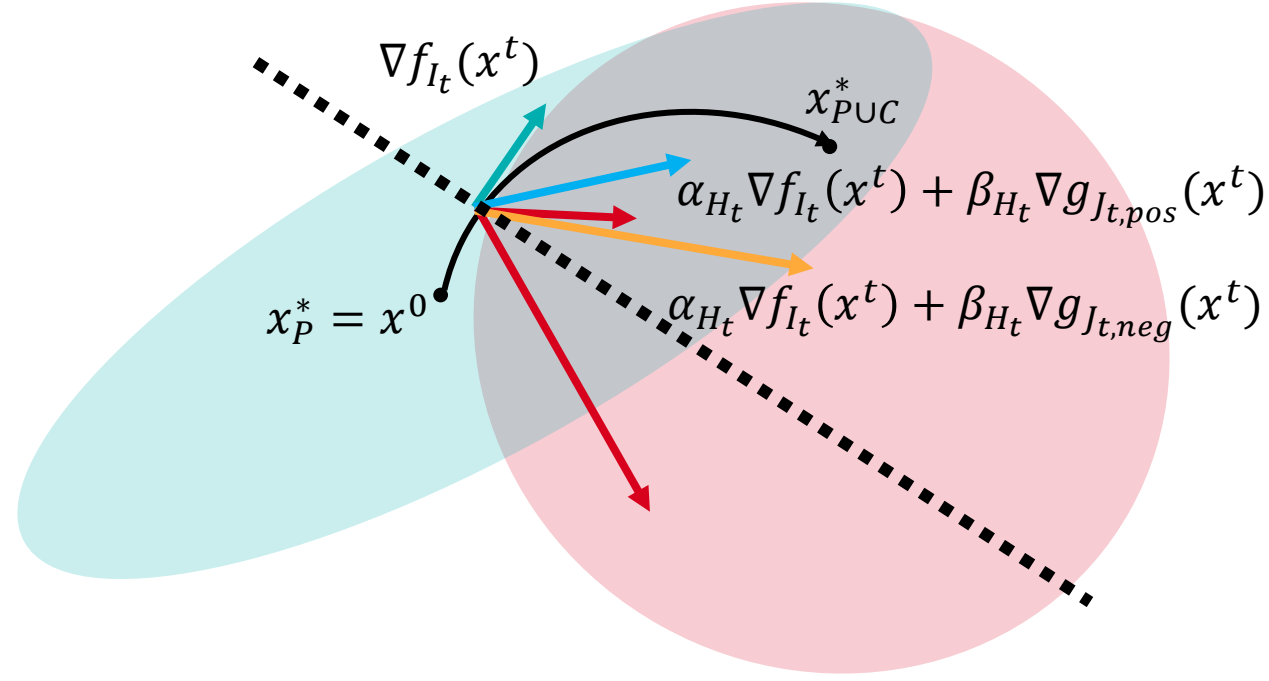

Supplement: supplementary_material [file attachment]

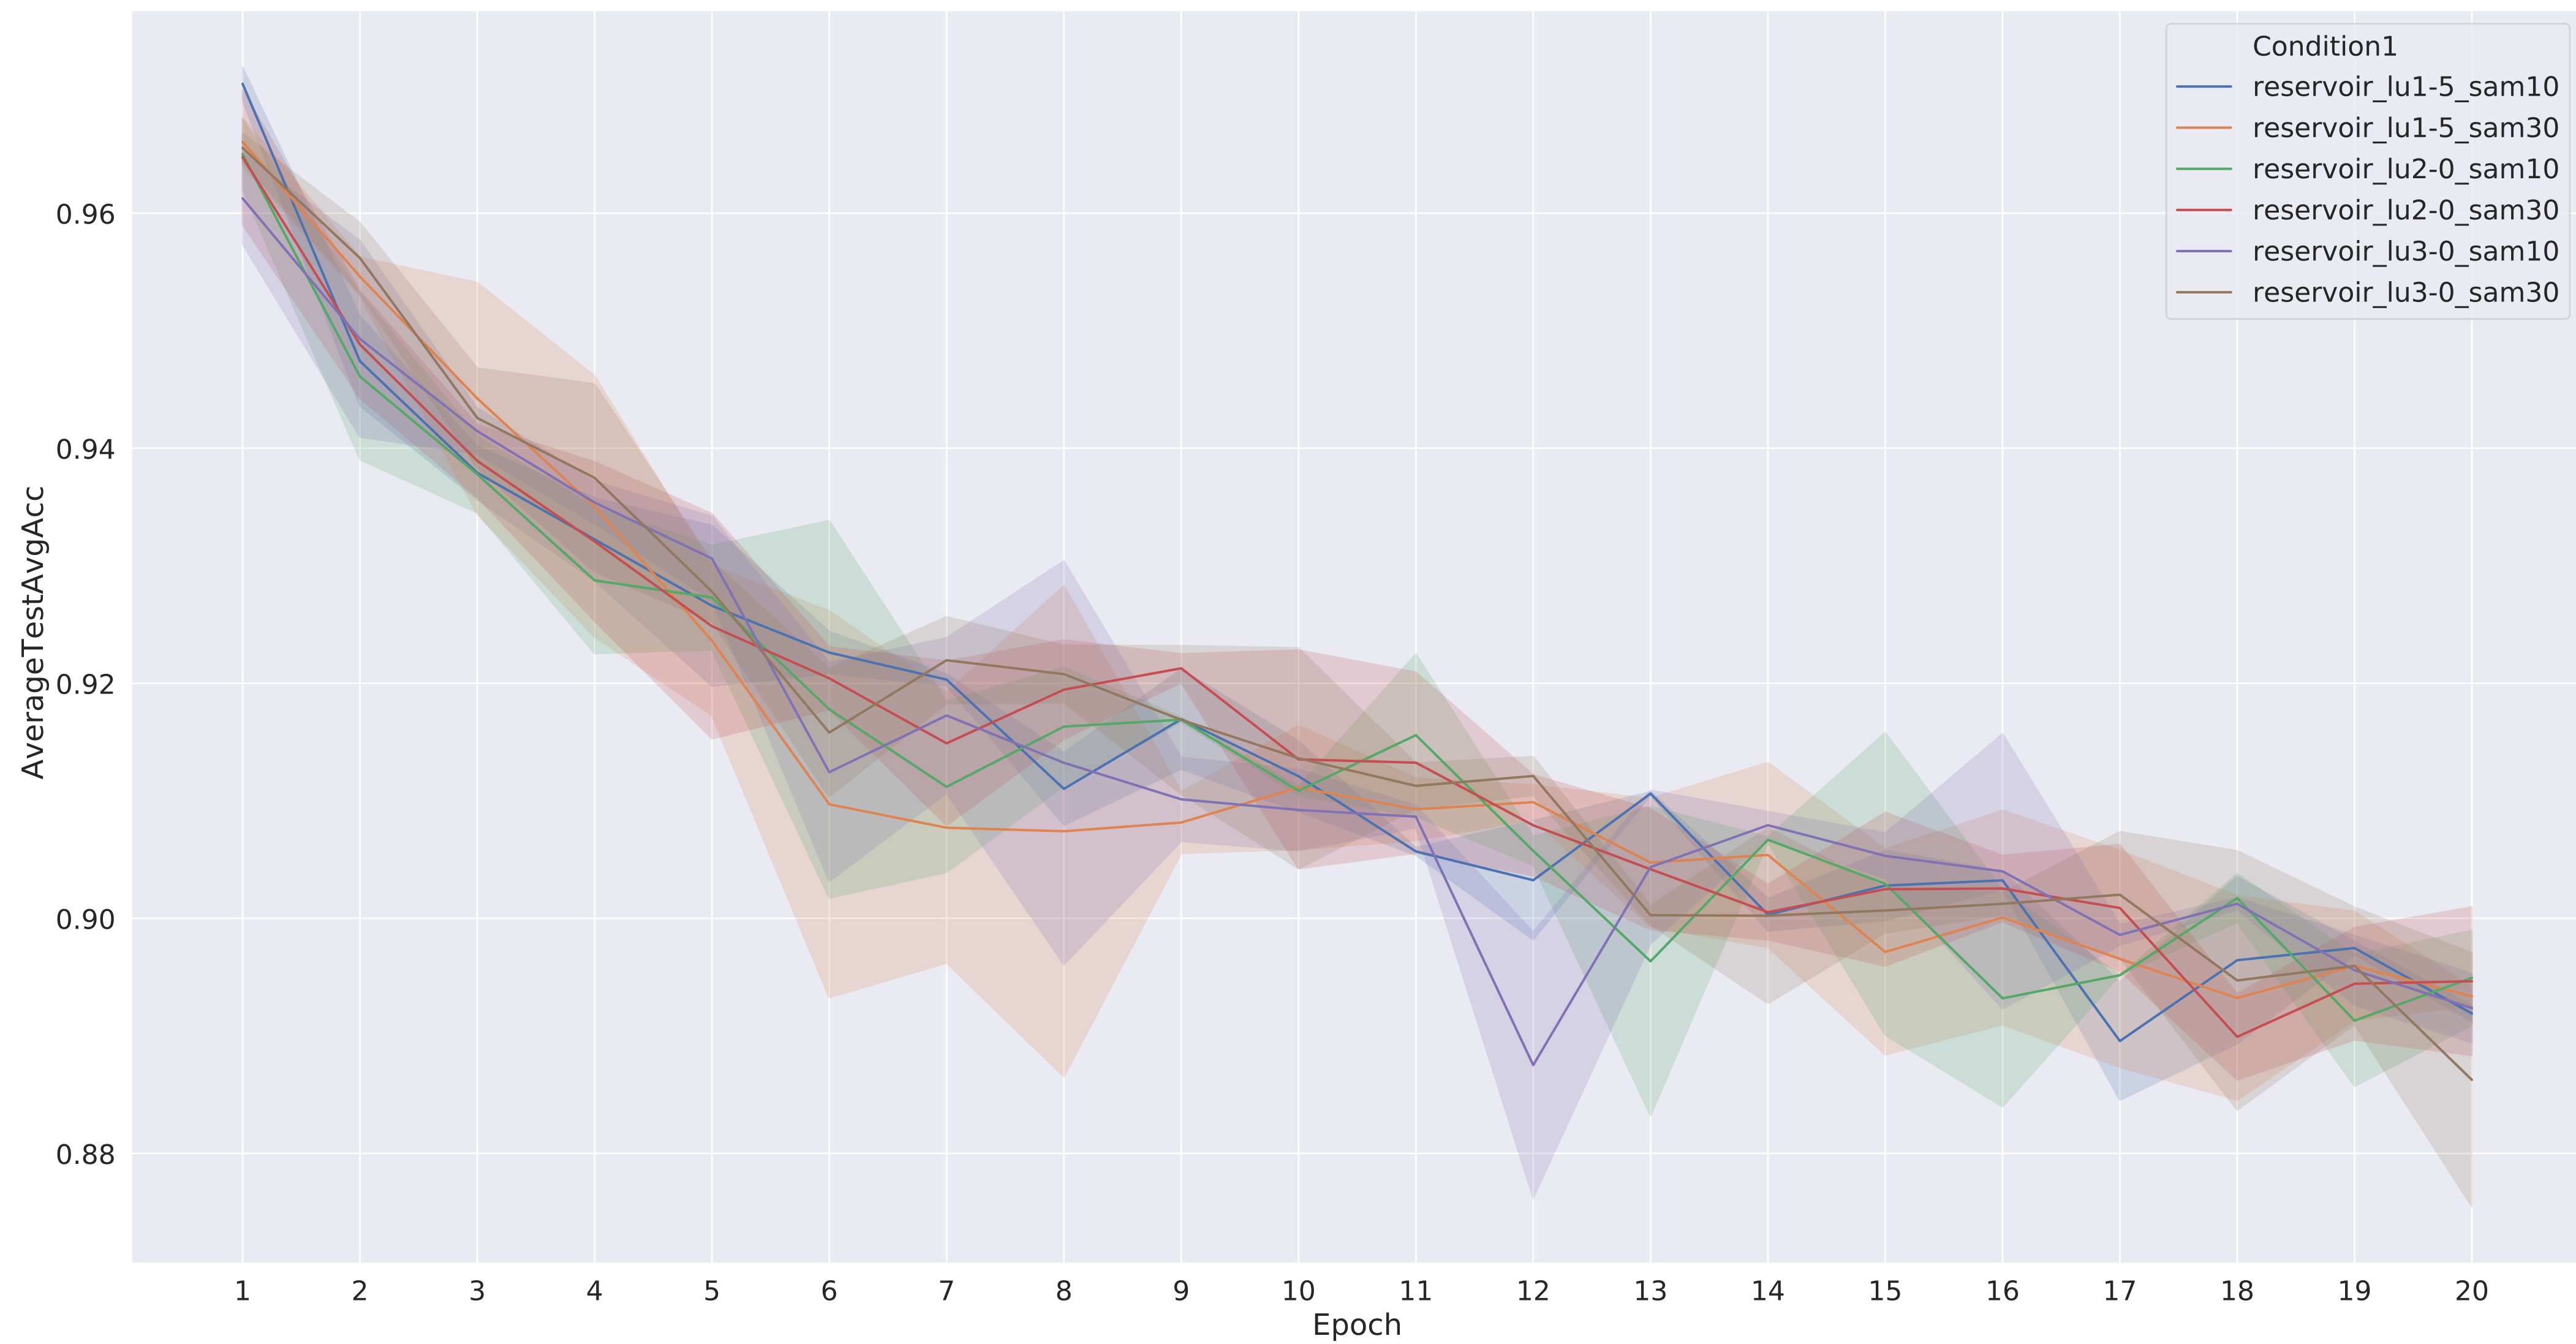

Supplement: supplementary_material [file attachment]

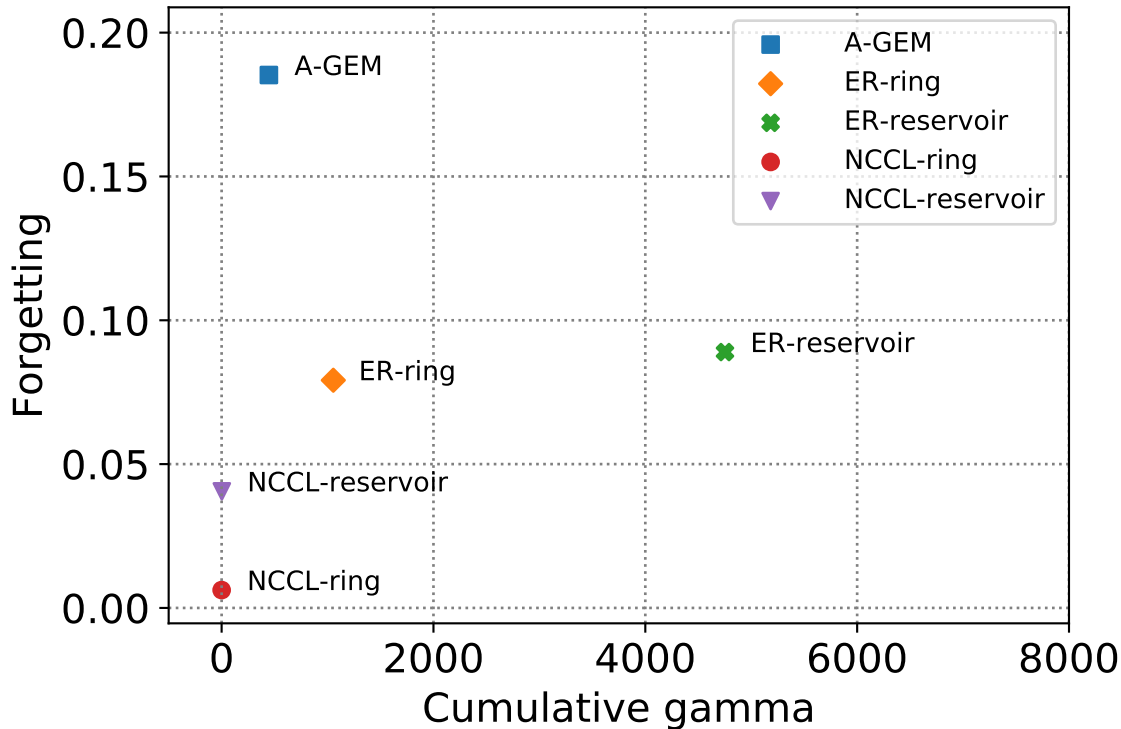

Supplement: supplementary_material [file attachment]

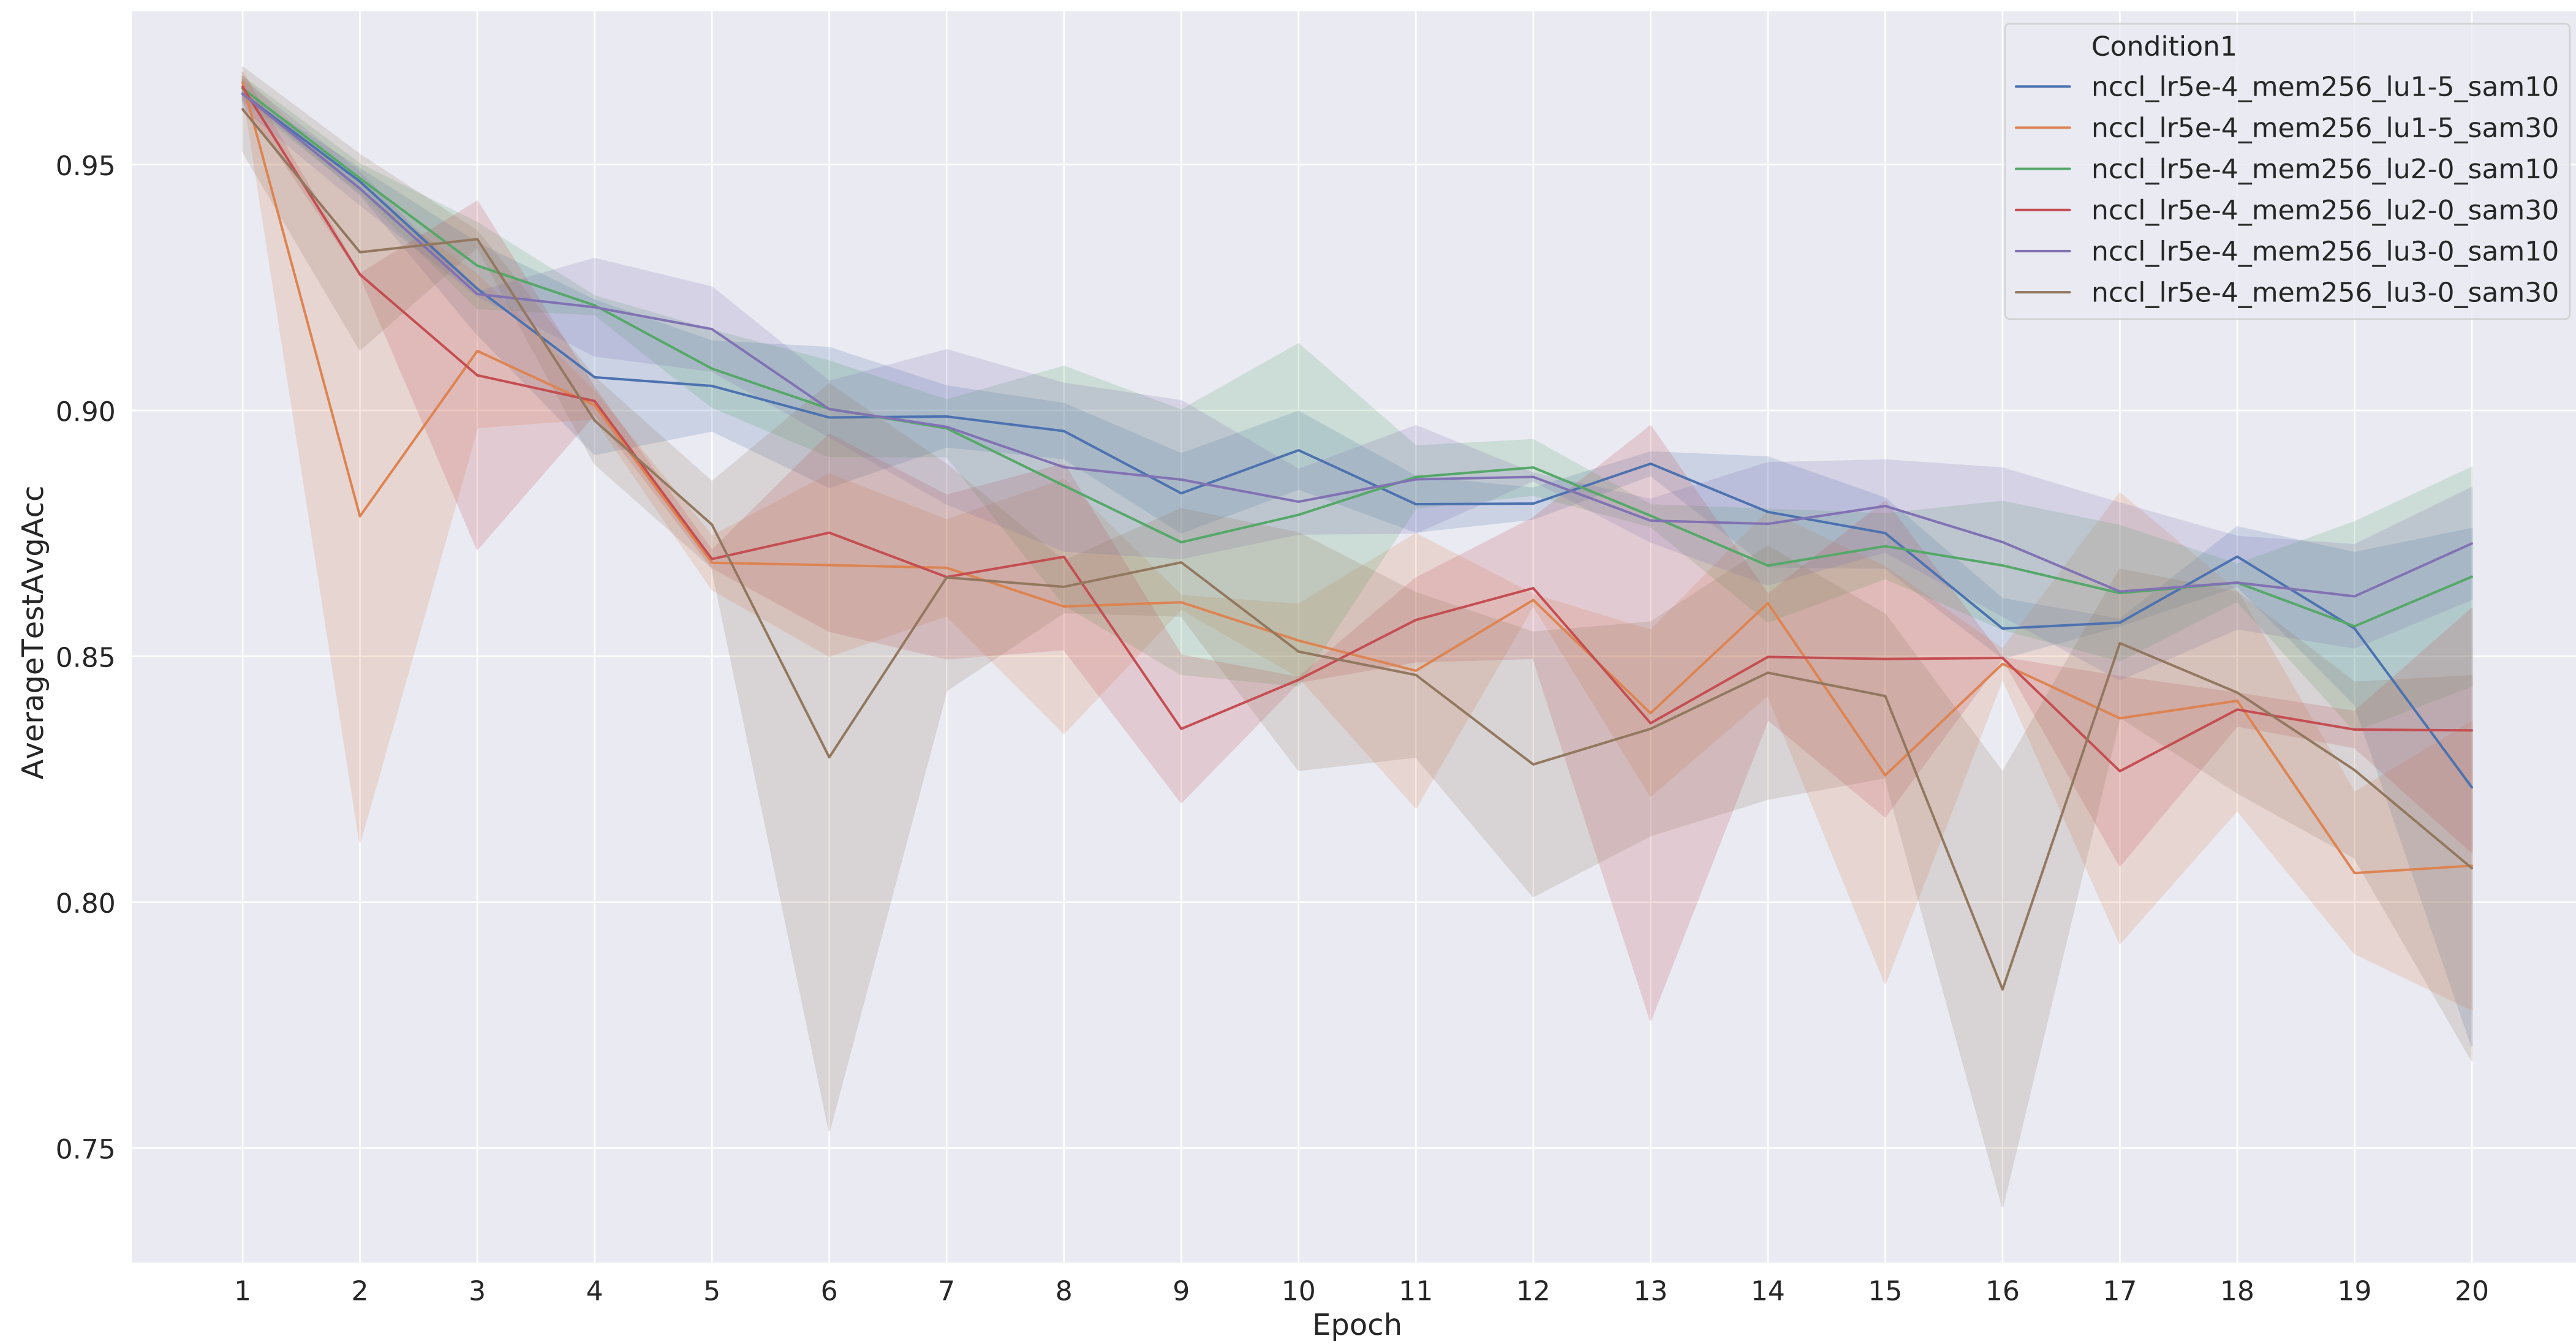

Supplement: supplementary_material [file attachment]

Gradient norm

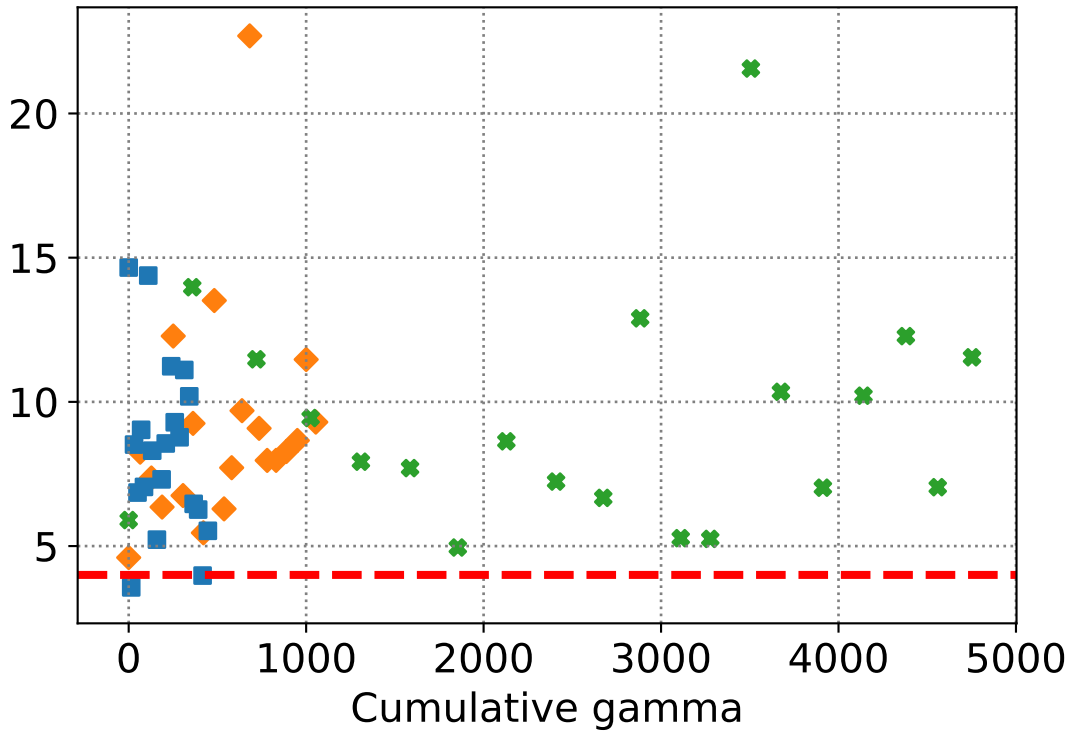

Supplement: supplementary_material [file attachment]

Gradient norm

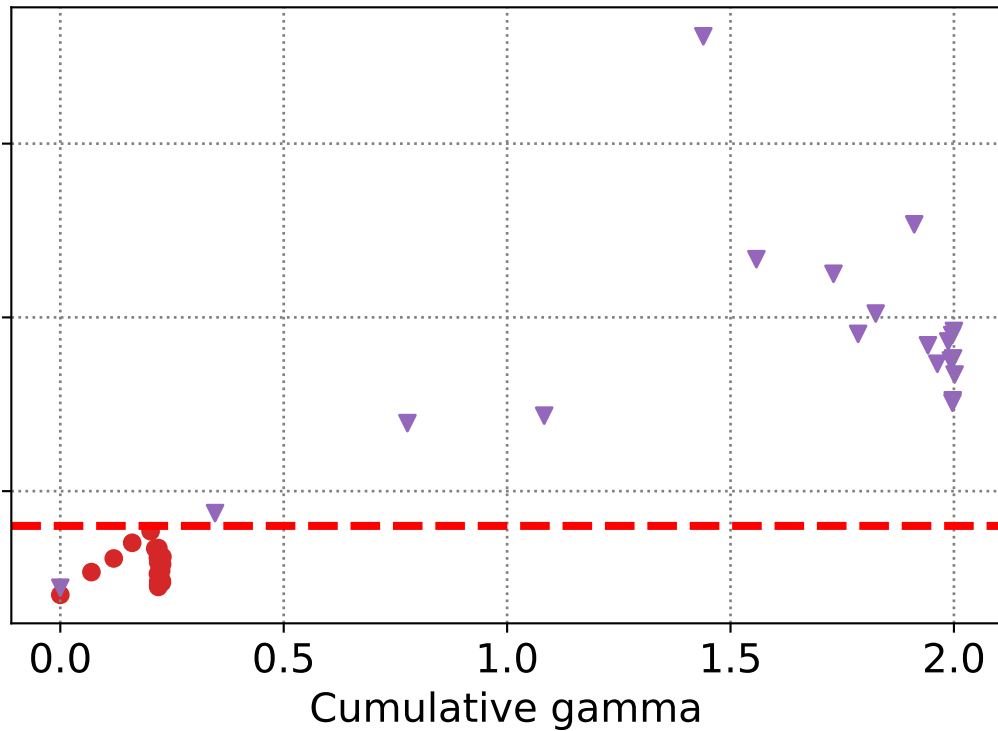

Supplement: supplementary_material [file attachment]

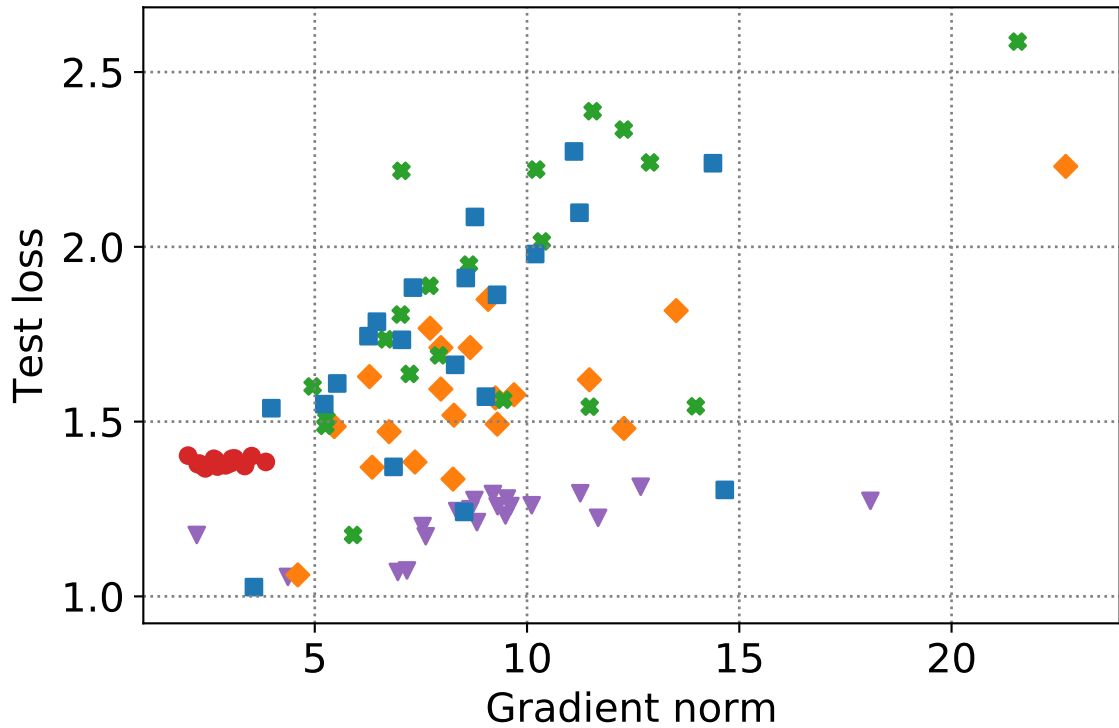

Supplement: supplementary_material [file attachment]

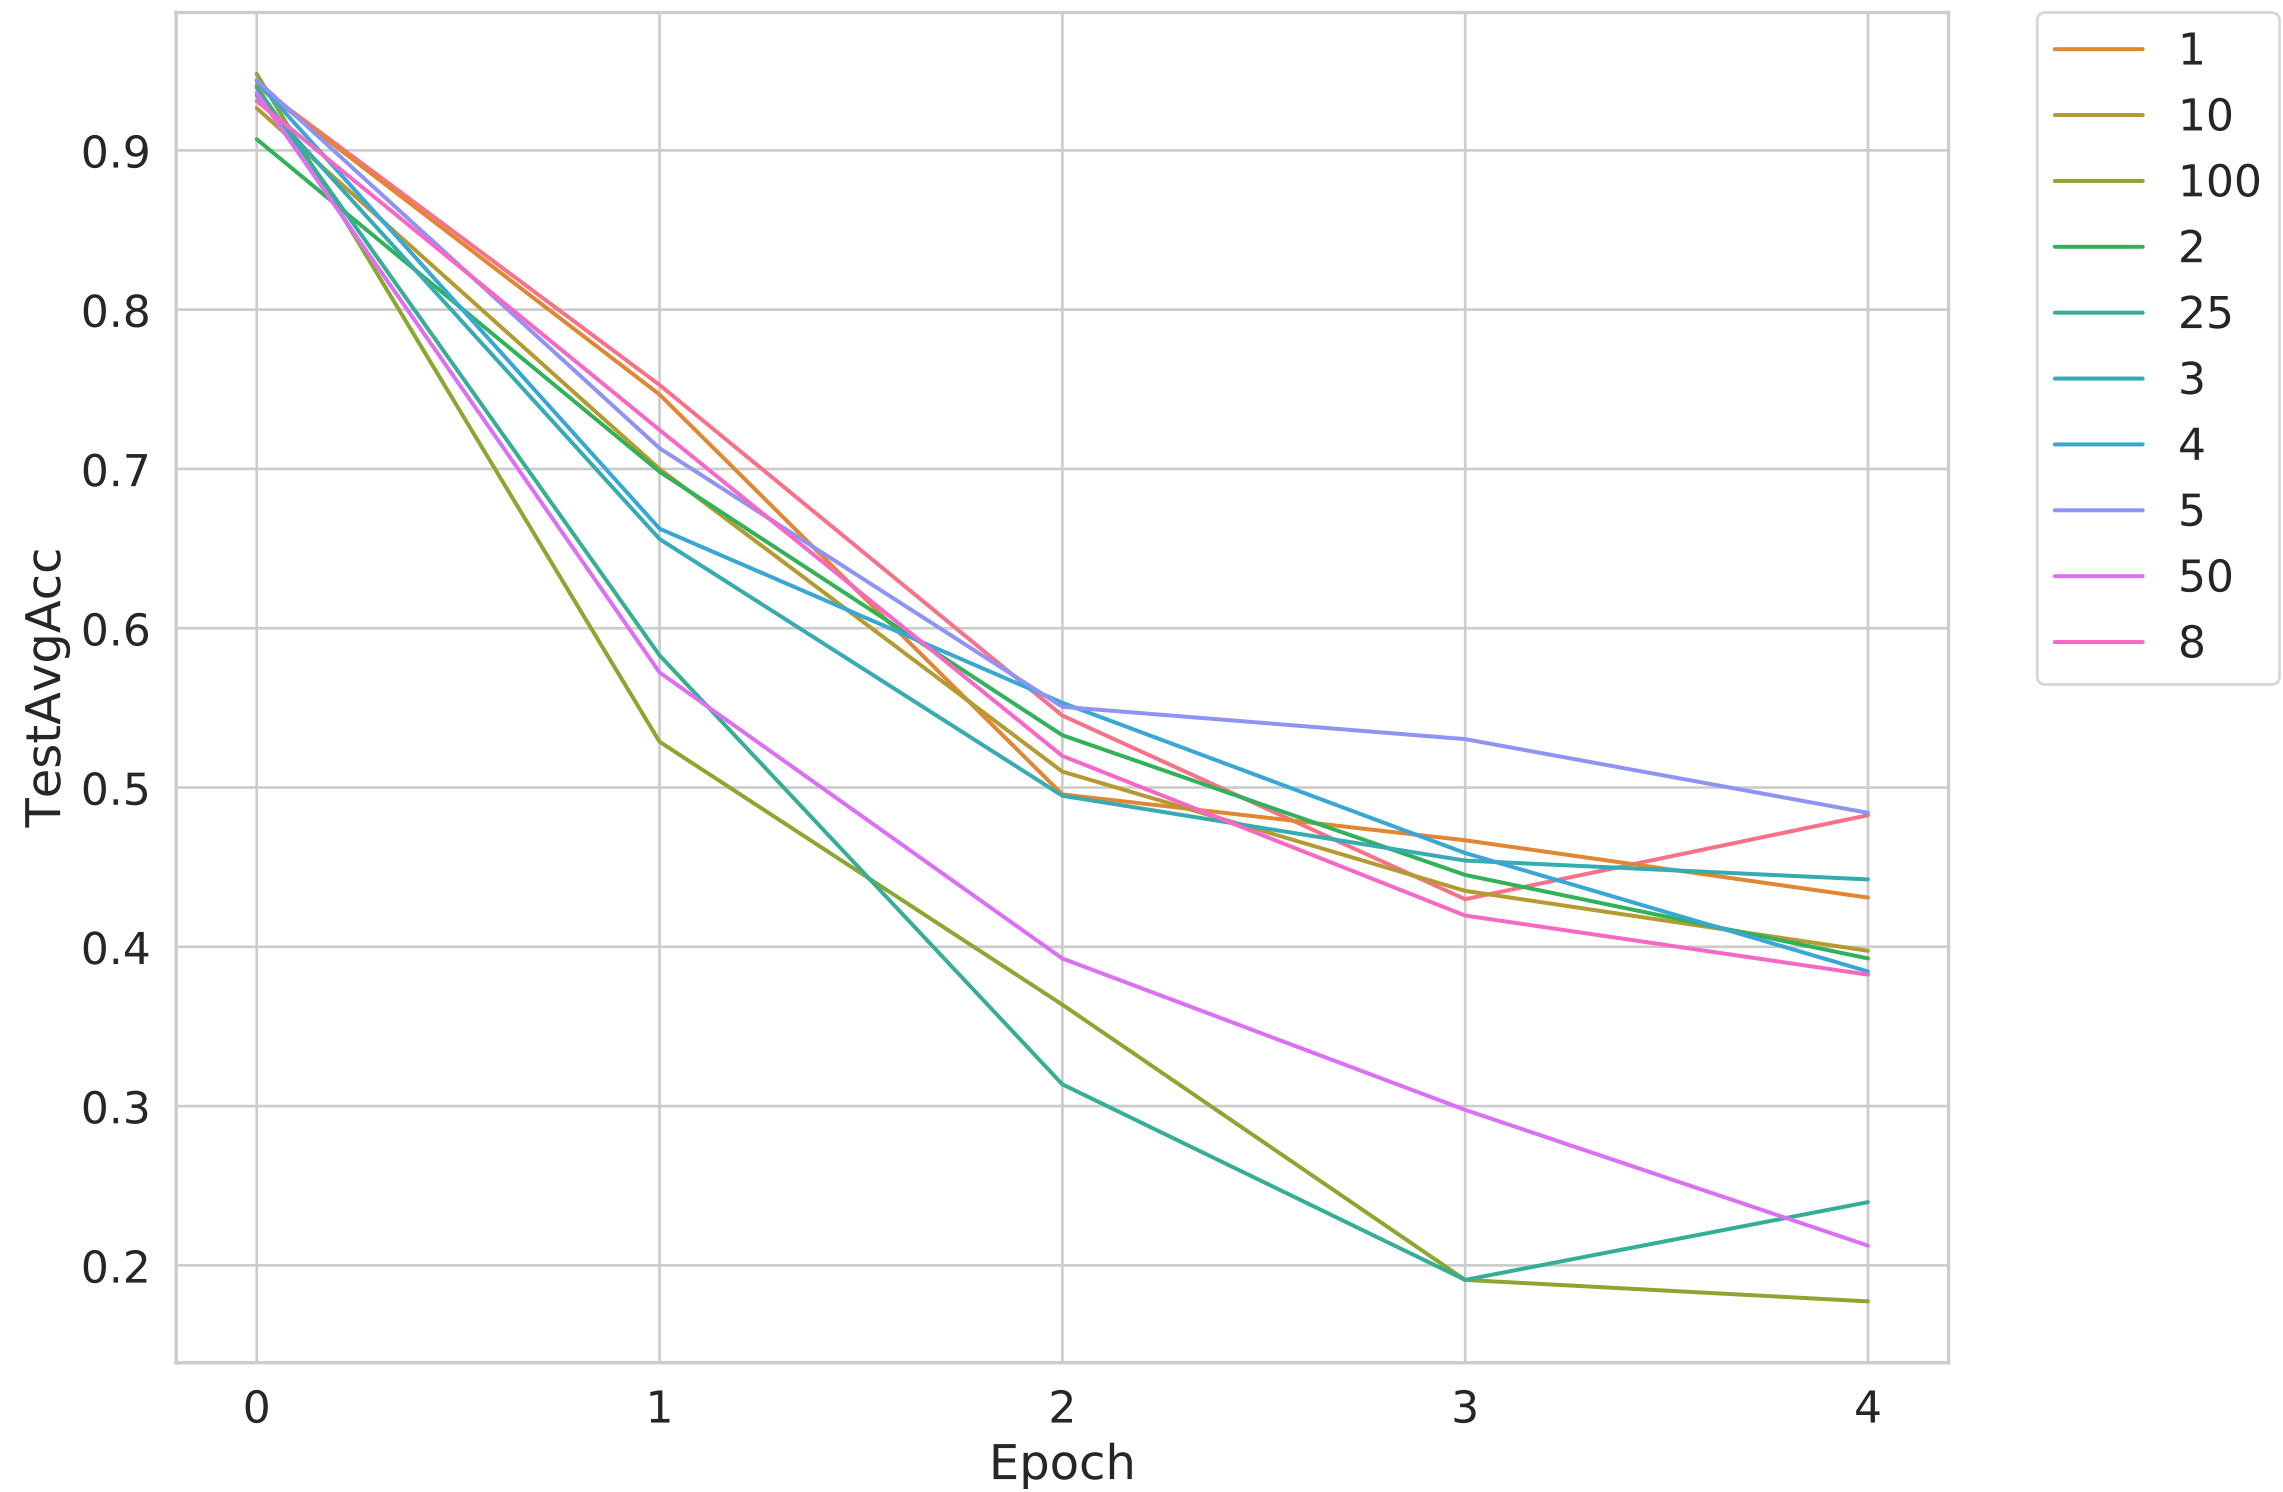

Supplement: supplementary_material [file attachment]

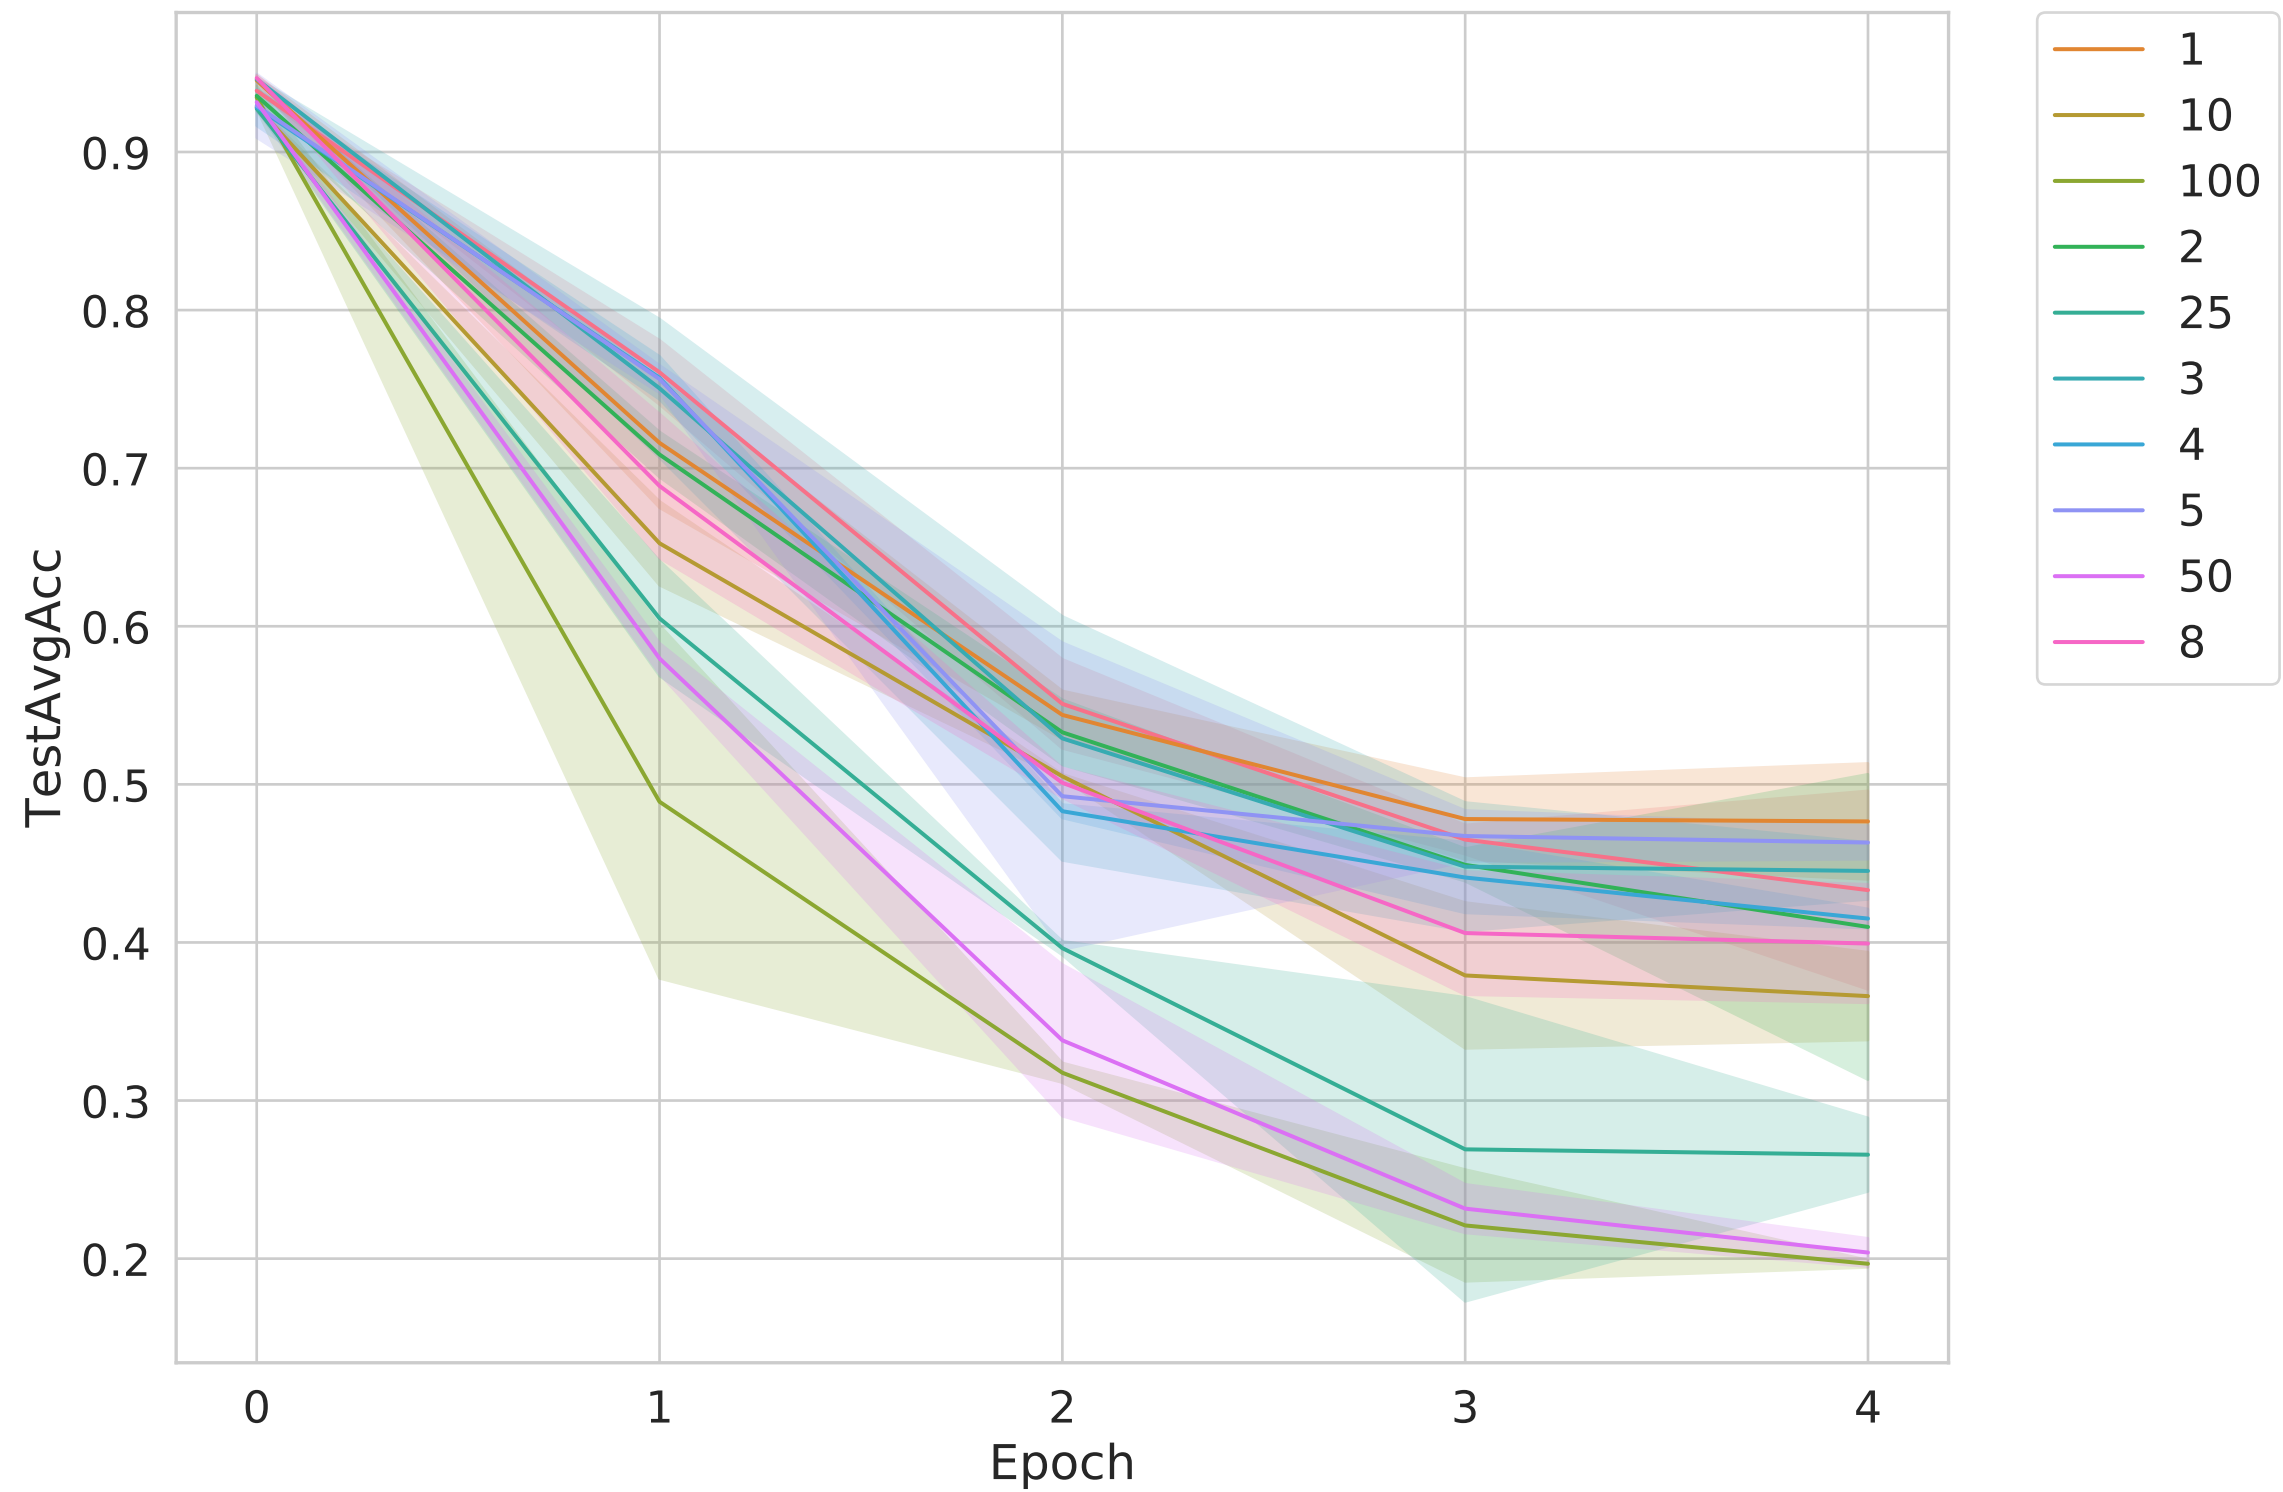

Supplement: supplementary_material [file attachment]

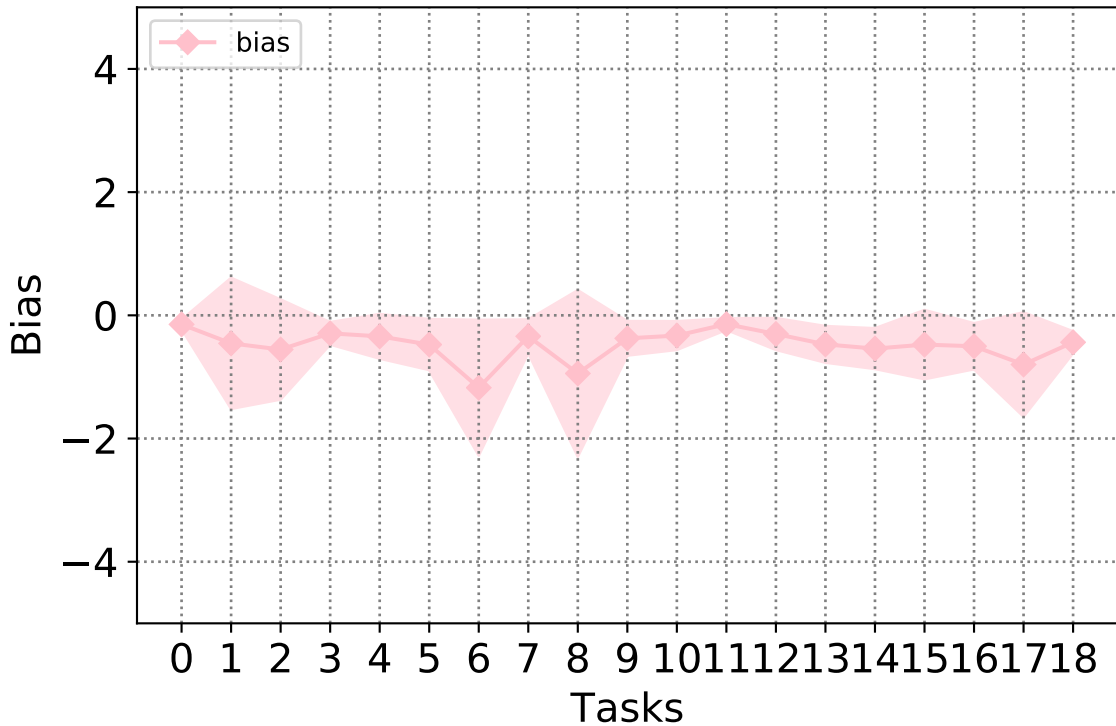

Supplement: supplementary_material [file attachment]
